# Supplementary material
Source: publisher site journal article supplement (https://www.kjim.org/upload/media/kjim-2023-323-Supplementary-Fig-2.pdf)
Supplement: Supplementary file 1 [file kjim-2023-323-Supplementary-Fig-2.pdf]

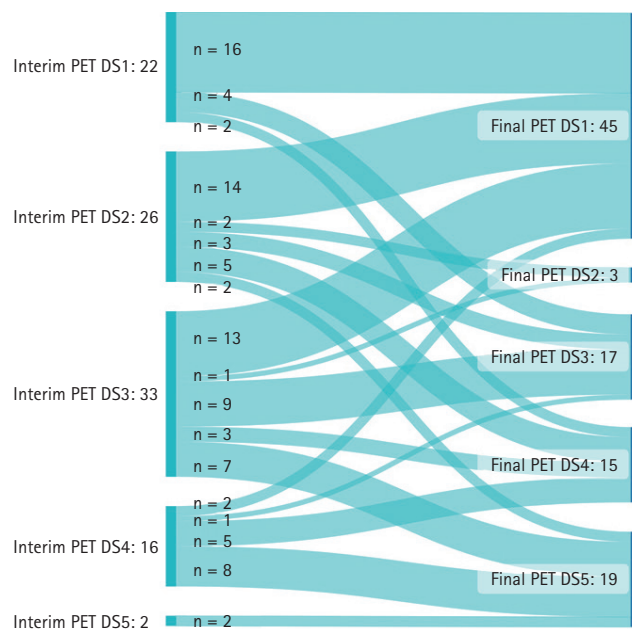

**Supplementary Figure 2.** The changes between interim and final PET/CT DS. PET/CT, positron emission tomography-computed tomography; DS, Deauville scale.
